# Supplementary material for: An ultrasensitive colorimetric aptasensor for ATP based on peptide/Au nanocomposites and hemin–G-quadruplex DNAzyme
Source: Royal Society of Chemistry journal article supplement (doi:10.1039/c4ra02823f), 2014-01-01
Supplement: c4ra02823f1.pdf [file c4ra02823f1.pdf]

1 ***Supplementary Information***

2

3 **An ultrasensitive colorimetric aptasensor for ATP based on**  
4 **peptide/Au nanocomposites and hemin-G-quadruplex DNzyme**

5

6 Shipeng Li<sup>#a</sup>, Liqiang Wang<sup>#a</sup>, Yuanqiang Hao<sup>a</sup>, Lili Zhang<sup>a</sup>, Binbin Zhou<sup>a,b</sup>, Liu  
7 Deng<sup>\*a</sup> and You-Nian Liu<sup>\*a</sup>

8

9 <sup>a</sup> *College of Chemistry and Chemical Engineering, Central South University,*  
10 *Changsha, Hunan 410083, P.R. China.*

11 <sup>b</sup> *Hunan Institute of Food Quality Supervision Inspection and Research, Changsha,*  
12 *Hunan 410111, P. R. China.*

13

14

15

16

17

18

19

---

\* Corresponding author: Tel:+86-731-8883-6964; fax: +86-731-8887-9616. E-mail address:  
[liudeng@csu.edu.cn](mailto:liudeng@csu.edu.cn) (L. Deng); [liuyounian@csu.edu.cn](mailto:liuyounian@csu.edu.cn) (Y. -N. Liu).

# These authors contributed equally to this work.

29-May-2012  
13:02:13  
MW:415.16  
120529-CFF 46 (2.384)

Probe: ESI  
Cone: 50v  
Desolvation Temp: 350

Capillary:3.00KV  
Extractor: 5v  
Gas Flow: 350  
Scan ES+  
6.16e6

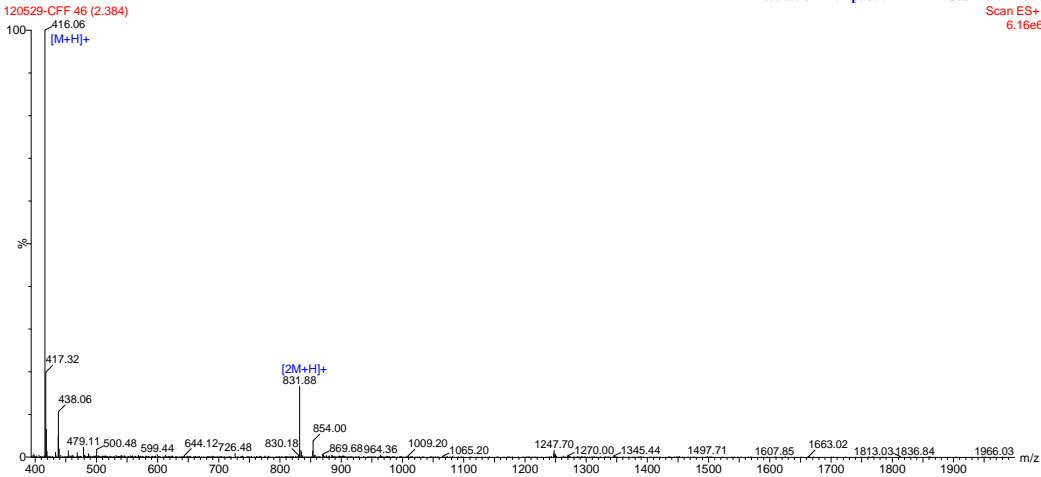

20

21 Fig. S1 Mass spectra of CFF.

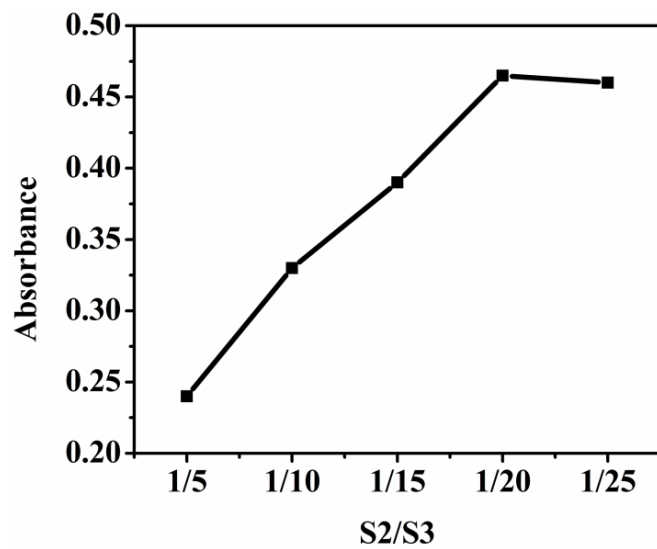

22

23 Fig. S2 Absorption change of the aptasensros at 450 nm with different molar ratios of

24 S2/S3.

25

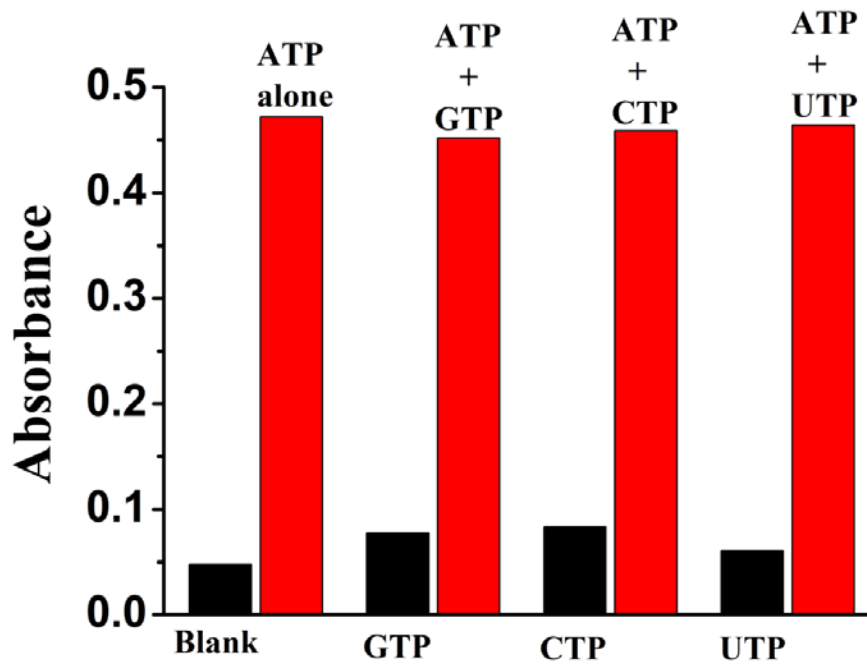

26

27

28

29

Fig. S3 Absorption response of the aptasensors at 450 nm to different ATP analogues (100 nM) (dark bars), followed by addition of ATP (1 nM) (red bars.)
